# Supplementary material
Source: publisher figshare collection journal article supplement (https://wiley.figshare.com/articles/dataset/_/3554223)
Supplement: Supplementary file 1 [file 1]

Jacob Usinowicz, S. Joseph Wright, and Anthony R. Ives. Year. Coexistence in tropical forests through asynchronous variation in annual seed production. *Ecology* VOL:pp–pp.

Appendix D. Derivation of the invasion rates,  $D_{ij}$ , given in Eq. 3.

To derive Eq. 3, we considered the two-species scenario where species  $i$  invades species  $j$ . We set  $\beta_{ii} = 0$  and  $\kappa_{ii} = 0$  to obtain a "worst-case" scenario, because positive values of  $\beta_{ii}$  and  $\kappa_{ii}$  facilitate coexistence, at least over the range of parameter values appropriate for our BCI data (Appendix A). In addition, we assumed that adult death rates are the same and set  $d_i = d_j = d$ . In the adult stage of the model (Eq. 2), invasion requires

$$\lim_{x_i \rightarrow 0} E \log \left[ \frac{x_i(t+1)}{x_i(t)} \right] = \lim_{x_i \rightarrow 0} E \log \left[ d + (1-d) \left[ \frac{s_i(t)}{x_i(s_i(t) + s_j(t))} \right] \right] \quad (\text{D.1})$$

Assuming  $d \rightarrow 1$ , this becomes

$$\left( E \left[ \frac{s_i(t)}{x_i(t)(s_i(t) + s_j(t))} \right] - 1 \right) > 0 \quad (\text{D.2})$$

and thus invasion requires  $E\left[\frac{s_i(t)}{x_i(t)(s_i(t)+s_j(t))}\right] > 1$ .

To specify  $s_i(t)$  and  $s_j(t)$ , we first expanded equation 1 by summing over the lag  $\tau$  time steps,

$$s_i(t) = \sum_{\tau=1}^{\infty} f_i^{\tau-1} \frac{R_i(t-\tau-1)x_i(t-\tau-1)}{1 + \alpha_{ii}R_i(t-\tau-1)x_i(t-\tau-1) + \alpha_{ij}R_j(t-\tau-1)x_j(t-\tau-1)}. \quad (\text{D.3})$$

Substituting for  $s_i(t)$  and  $s_j(t)$ , and recognizing that at the invasion boundary  $\frac{x_i(t-\tau)}{x_i(t)} \approx 1$ , leads to

$$E\left[\frac{s_i(t)}{x_i(t)(s_j(t)+s_i(t))}\right] \approx E\left[\frac{\sum_{\tau=1}^t f_i^{\tau} \frac{R_i(t-\tau-1)}{1 + \alpha_{ij}R_j(t-\tau-1)}}{\sum_{\tau=1}^t f_j^{\tau} \frac{R_j(t-\tau-1)}{1 + \alpha_{jj}R_j(t-\tau-1)}}\right] \quad (\text{D.4})$$

This gives Eq. 3.
